# Supplementary material for: Type, Timing, Frequency, and Durability of Outcome of Physical Therapy for Parkinson Disease: A Systematic Review and Meta-Analysis
Source: PubMed Central journal article supplement (PMC10362470; doi:10.1001/jamanetworkopen.2023.24860), 2023-07-21
Supplement: jamanetwopen-e2324860-s002.pdf [file jamanetwopen-e2324860-s002.pdf]

## Data Sharing Statement

El Hayek. Type, Timing, Frequency, and Durability of Outcome of Physical Therapy for Parkinson Disease. *JAMA Netw Open*. Published July 21, 2023.  
doi:10.1001/jamanetworkopen.2023.24860

### Data

**Data available:** No
